# Supplementary material for: Mast Cell Chymase/Mcpt4 Suppresses the Host Immune Response to Plasmodium yoelii, Limits Malaria-Associated Disruption of Intestinal Barrier Integrity and Reduces Parasite Transmission to Anopheles stephensi
Source: Frontiers journal article supplement (doi:10.3389/fimmu.2022.801120), 2022-01-27
Supplement: Data_Sheet_1.PDF [file Data_Sheet_1.PDF]

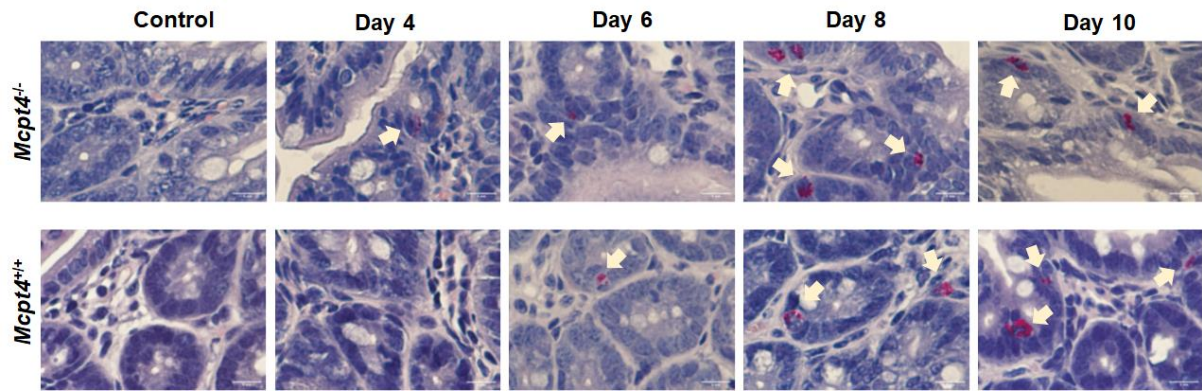

**Supplementary Figure 1.** Representative naphthol AS-D chloroacetate esterase (NASDCE) stained MCs (pink cells indicated by yellow arrows) in ileum of *Mcpt4*<sup>-/-</sup> (top) and *Mcpt4*<sup>+/+</sup> (bottom) mice in uninfected controls at indicated time points PI.

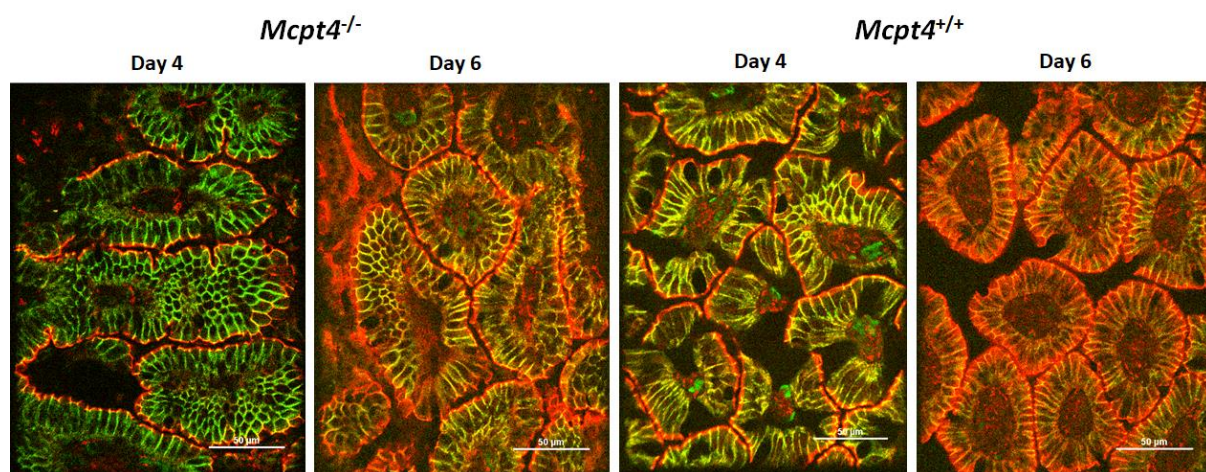

**Supplementary Figure 2.** Enlarged representative images of ileum tissue from *P. y. yoelii* 17XNL-infected *Mcpt4*<sup>-/-</sup> mice (left) and *Mcpt4*<sup>+/+</sup> mice (right) stained for E-cadherin (green) and ZO-1 (red) at days 4 and 6 post infection.

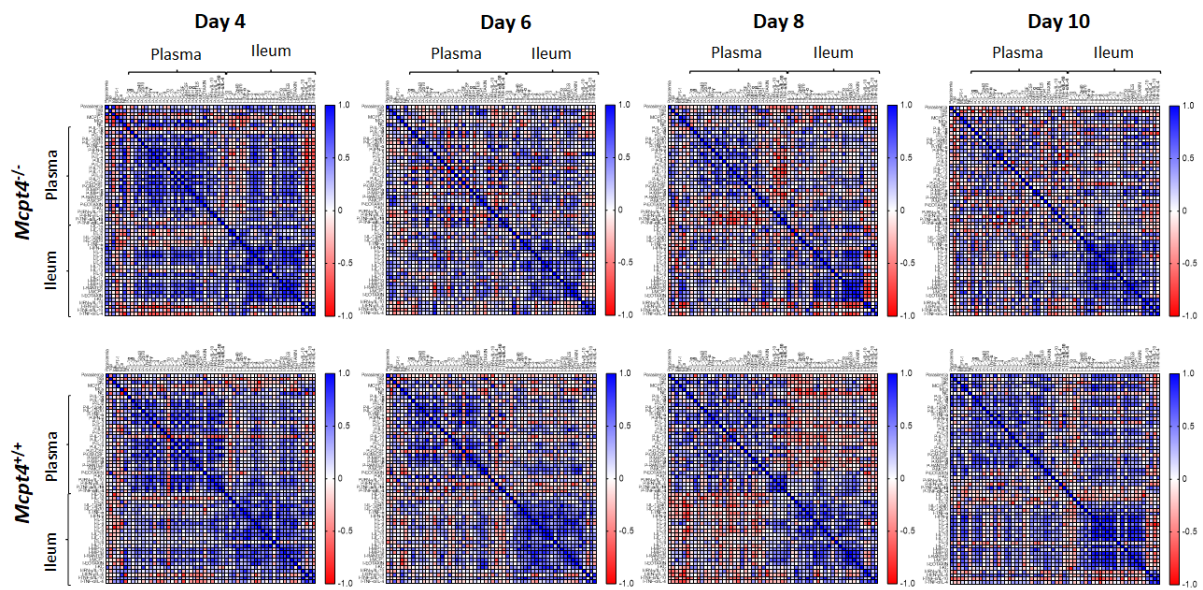

**Supplementary Figure 3. Hierarchical clustering.** Heat map representation of Spearman's correlations between parasitemia, blood 16S levels, ileal MC numbers, levels of plasma and ileal cytokines and chemokines, plasma IgE and plasma Mcpt1 for *P. y. yoelii* 17XNL-infected *Mcpt4*<sup>-/-</sup> mice (top) and *Mcpt4*<sup>+/+</sup> mice (bottom) at 4, 6, 8 and 10 days PI. The heat map colors correspond to correlations grading from 1 (positive correlation, blue), no correlation (white) to -1 (negative correlation, red). P values  $\leq 0.05$  were considered significant.
